# Supplementary material
Source: HighWire-hosted journal article supplement (https://bmjpaedsopen.bmj.com/content/2/1/e000201)
Supplement: inline-supplementary-material-1 [file inline-supplementary-material-1.pdf]

## Appendix 1

### Example of Search Strategy

Search for: from 15 [limit 14 to (yr="2000 -Current" and "all child (0 to 18 years)" and english)]

Database: Ovid MEDLINE(R) 1946 to Present with Daily Update

Search Strategy:

- 
- 1 iatrogenic disease/ or cross infection/ (70658)
  - 2 iatrogenic.mp. (33568)
  - 3 medical errors/ or exp medication errors/ or near miss, healthcare/ (30938)
  - 4 patient harm/ or patient safety/ (14645)
  - 5 hospitalization/ or "length of stay"/ (168954)
  - 6 adolescent, hospitalized/ or child, hospitalized/ (6783)
  - 7 patient experience.mp. (3005)
  - 8 1 or 2 or 3 or 4 or 5 or 6 or 7 (302463)
  - 9 exp Intellectual Disability/ (95805)
  - 10 exp Cognition Disorders/ (85267)
  - 11 exp Learning Disorders/ (24037)
  - 12 Developmental Disabilities/ (19261)
  - 13 9 or 10 or 11 or 12 (216241)
  - 14 8 and 13 (2354)
  - 15 limit 14 to (yr="2000 -Current" and "all child (0 to 18 years)" and english) (391)
